# Supplementary material
Source: PubMed Central journal article supplement (PMC4787875)
Supplement: mart696823.wf1_default.pdf [file mart696823.wf1_default.pdf]

## Box 1: Standard invitation

<practice headed paper>

<Patient EMIS number>

<Patient name>

<Patient address>

<space for handwritten date>

Dear <patient>

### **Screening for diabetes**

Your surgery is offering screening for Type 2 diabetes. People who are at increased risk of developing diabetes are being invited to come for a simple, finger-prick blood test. Details in your GP health records suggest that you might have a higher chance of developing it. These details include your age, gender, medication, weight, and family history of diabetes.

### **What is Type 2 diabetes?**

About 9 in every 100 people in the UK between 40 and 70 have Type 2 diabetes. Unfortunately, half of them don't know it. Most people with Type 2 diabetes usually feel well in the early stages of the disease. But this can hide the fact that diabetes is a serious disease that causes long-term problems.

### **What now?**

*If you want to come for screening.*

A screening appointment has already been arranged for.

---

If you can't make this time, please contact the surgery for a time that is better for you. If you need interpreting services please let us know at least a week before your appointment.

*If you do not want to come for screening.*

Please contact the surgery to say that you do not want the appointment.

Yours sincerely,

<practice contact name>
